# Supplementary material for: Optimizing the coordination environment of Cu single-atom catalyst for efficient electroreduction of CO2 to CH3OH
Source: Research Square preprint supplement (doi:10.21203/rs.3.rs-4171616/v1), 2024-04-24
Supplement: Supplementary file 1 [file 314679ef3ce0c6801df707d6.docx]

**Supporting Information**

**Optimizing the coordination environment of Cu single-atom catalyst for efficient electroreduction of CO2 to CH3OH**

Guodong Sun*1, Yanan Cao2, Deqing Li3, Yingfei Ma1, Mengchen Sun2

*****1 A. Prof G. Sun, Materials and packaging engineering, Fujian Polytechnic Normal University, Fuzhou, Fujian Province, 350330, the People's Republic of China, Email: sunguodong20@mails.ucas.ac.cn.

2 School of Chemical Sciences, National Engineering Laboratory for VOCs Pollution Control Material & Technology, University of Chinese Academy of Sciences, Beijing, 100049, the People's Republic of China.

3 School of Vehicle and Mobility, Tsinghua University, Beijing, 100049, the People's Republic of China.

**Supplementary Index**

**Fig. S1** HAADF-STEM images of (a) CuN3-C and (b) CuN4-C catalysts.

**Fig. S2** High-resolution X-ray photoelectron spectroscopy (XPS) of (a) CuN3-C and (b) CuN4-C catalysts.

**Fig. S3** Deconvoluted N 1s spectra of (a) CuN3-C and (b) CuN4-C catalysts.

**Fig. S4** Fourier transforms of the Cu K-edge EXAFS oscillations in the k space of simulated (a) CuN3-C and (b) CuN4-C catalysts.

**Fig. S5** TEM images of (a) CuN3-C and (b) CuN4-C catalysts.

**Fig. S6** HAADF-STEM images of (a) N-C and (b) C samples.

**Fig. S7** Deconvoluted N 1s spectra of (a) N-C and (b) C samples.

**Fig. S8** Amperage curves of CO2 reduction catalyzed by CuN3-C in first 300 seconds at different potentials.

**Fig. S9** LSV andFaradaic efficiency distributions of CO2RR on (a) N-C and (b) C samples.

**Fig. S10** HAADF-STEM images of CuN3-C catalyst after test.

**Fig. S11** Structure and morphology of catalysts after the CO2RR electrolysis.

**Fig. S12** EXAFS spectra of CuN3-C catalyst after the CO2RR electrolysis

**Fig. S13** Model of CuN3-C catalyst.

**Fig. S14** Model of CuN4-C catalyst.

**Table S1.** EXAFS fitting parameters at the Cu K-edge for various samples（*Ѕ*02=0.90 from Cu-foil）

**Table. S2** The Onset potential and current density of catalysts reacting with different gases.

**Table. S3** The Onset potential and Current density of catalysts reacting with different gases.

**Table.S4** Faradaic efficiency distributions of CO2RR over Cu4N-C

**Table. S5** Faradaic efficiency distributions of CO2RR over CuN3-C

**Table S6** Comparison of the FE of CH3OH in aqueous conditions from this work and previous representative reports.

**Table S7** Comparison of the rate of CH3OH in aqueous conditions from this work and previous representative reports.

**Table S8** The Onset potential and Current density of C and N-C reacting with different gases.

**Table S9** Faradaic efficiency distributions of CO2RR over C and N-C

**Table S10** Nyquist plot of catalysts over the frequency from 0.1 MHz to 0.1 Hz

**Table 11.** EXAFS fitting parameters at the Cu K-edge for various samples（*Ѕ*02=0.90 from Cu-

**Table 12** Energy of the CH3OH pathway on CuN3-C catalyst

**Table 13** D-band center of catalysts


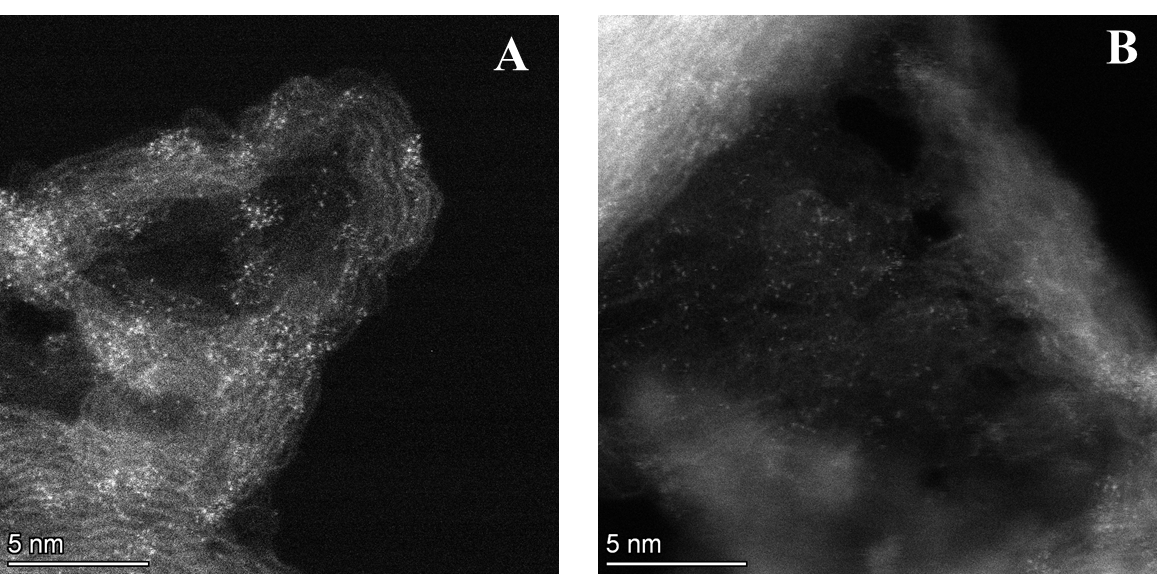


**Fig. S1** HAADF-STEM images of (a) CuN3-C and (b) CuN4-C catalysts.


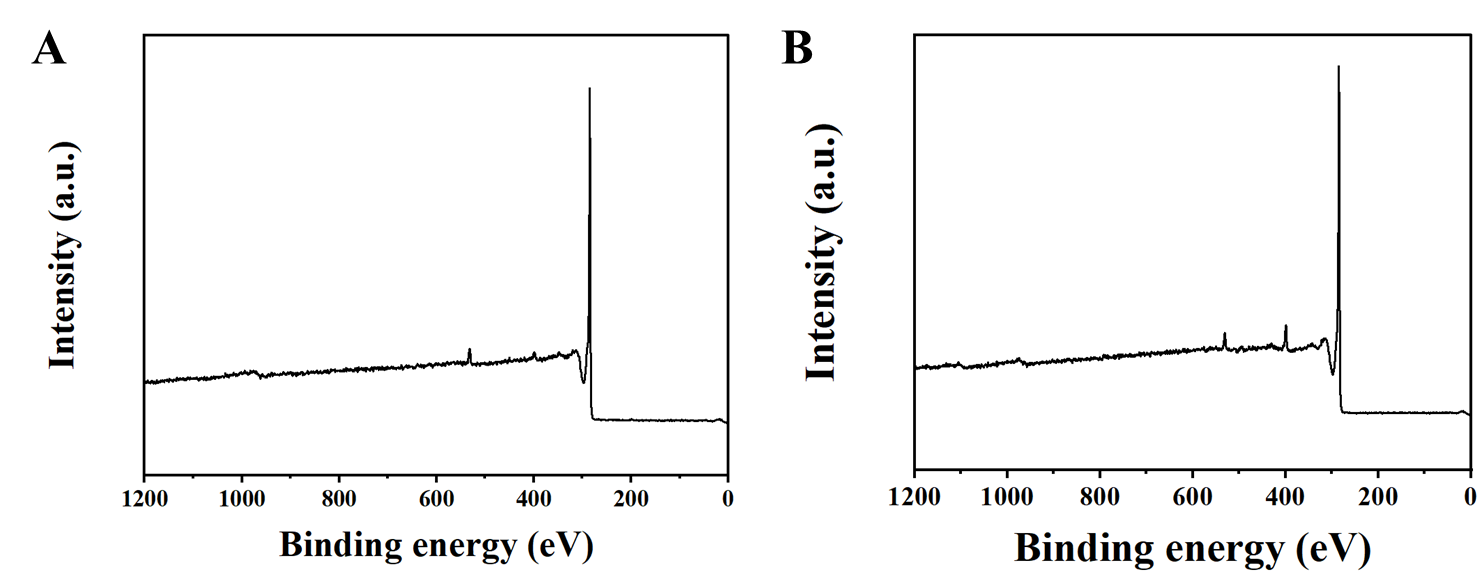


**Fig. S2** High-resolution X-ray photoelectron spectroscopy (XPS) of (a) CuN3-C and (b) CuN4-C catalysts.


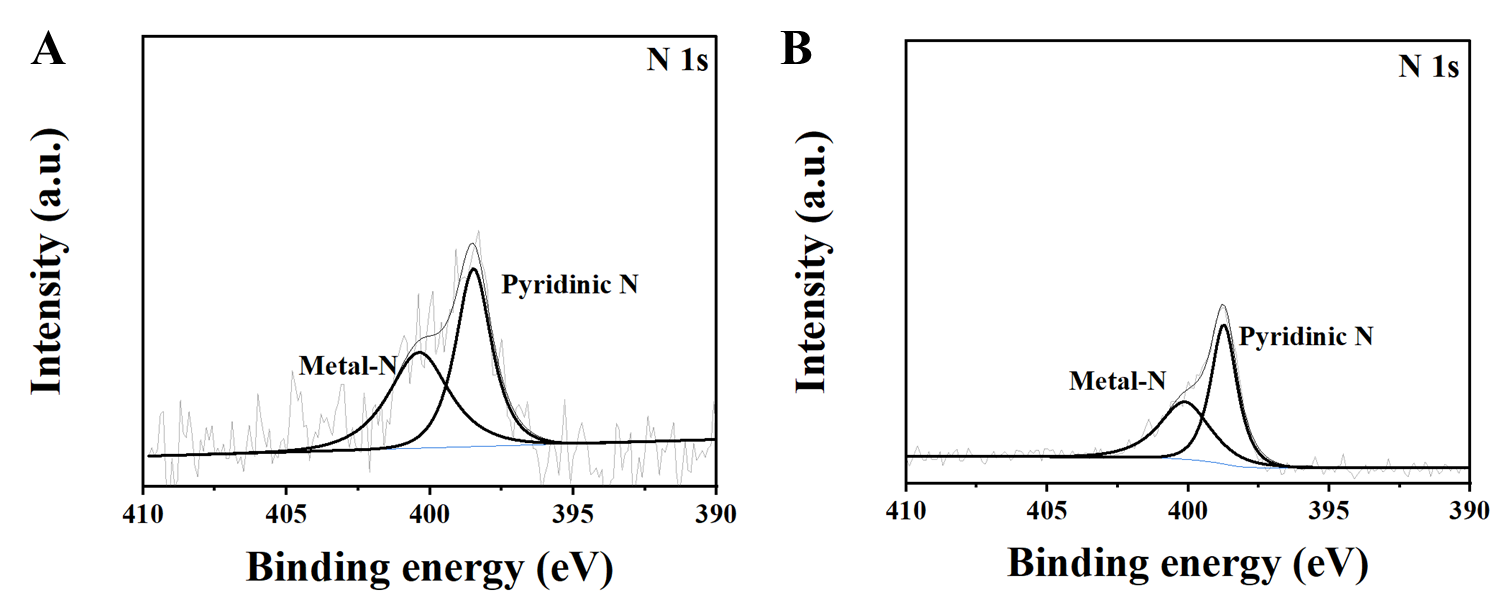


**Fig. S3** Deconvoluted N 1s spectra of (a) CuN3-C and (b) CuN4-C catalysts.


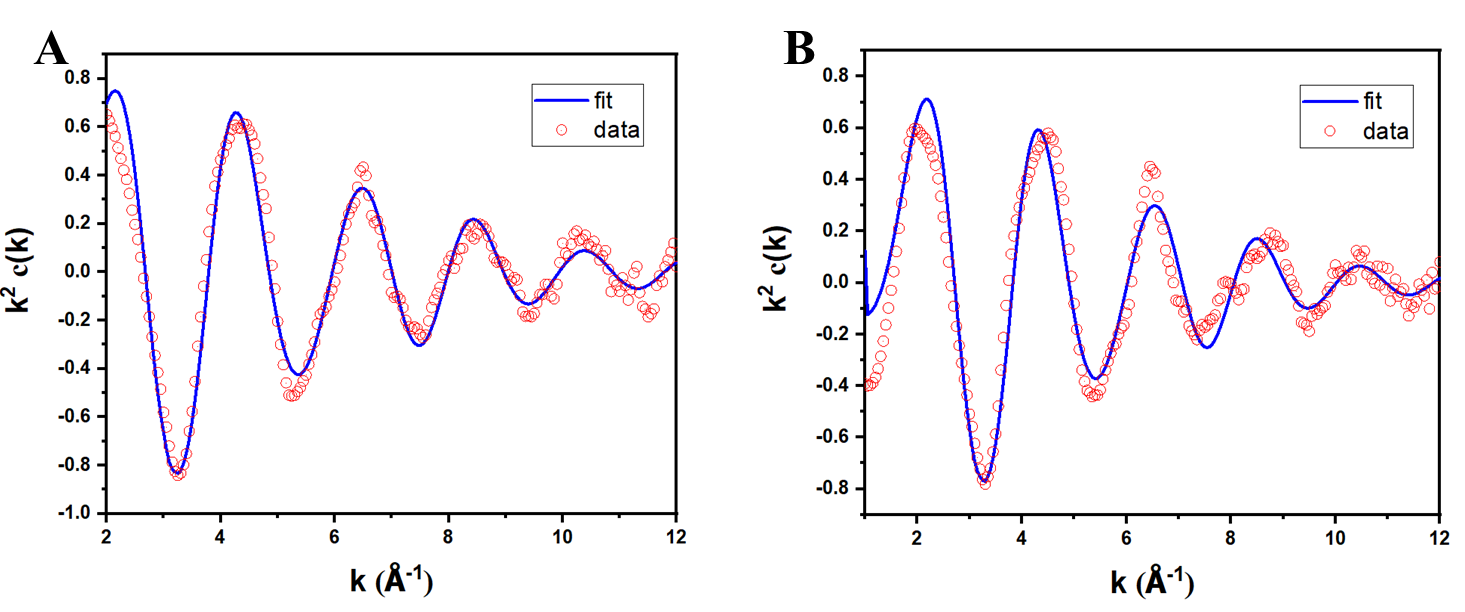


**Fig. S4** Fourier transforms of the Cu K-edge EXAFS oscillations in the k space of simulated (a) CuN3-C and (b) CuN4-C catalysts.


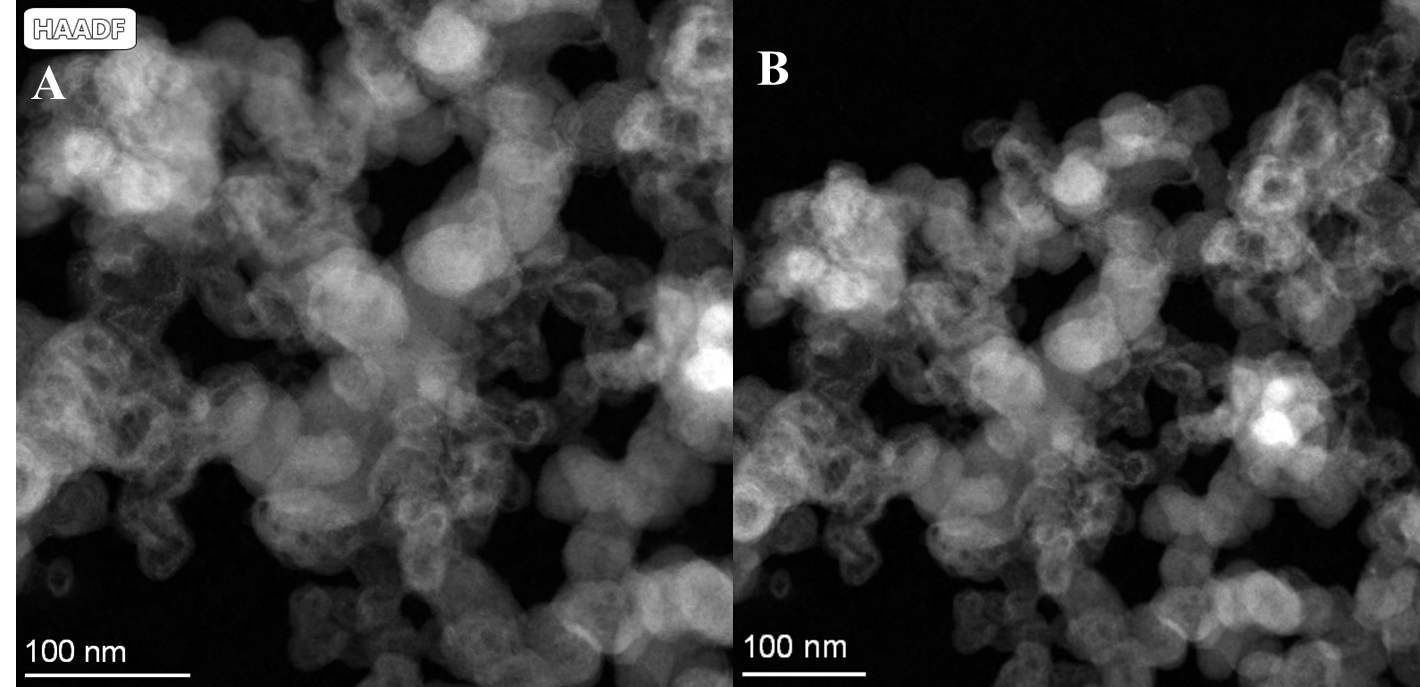


**Fig. S5** TEM images of (a) CuN3-C and (b) CuN4-C catalysts.


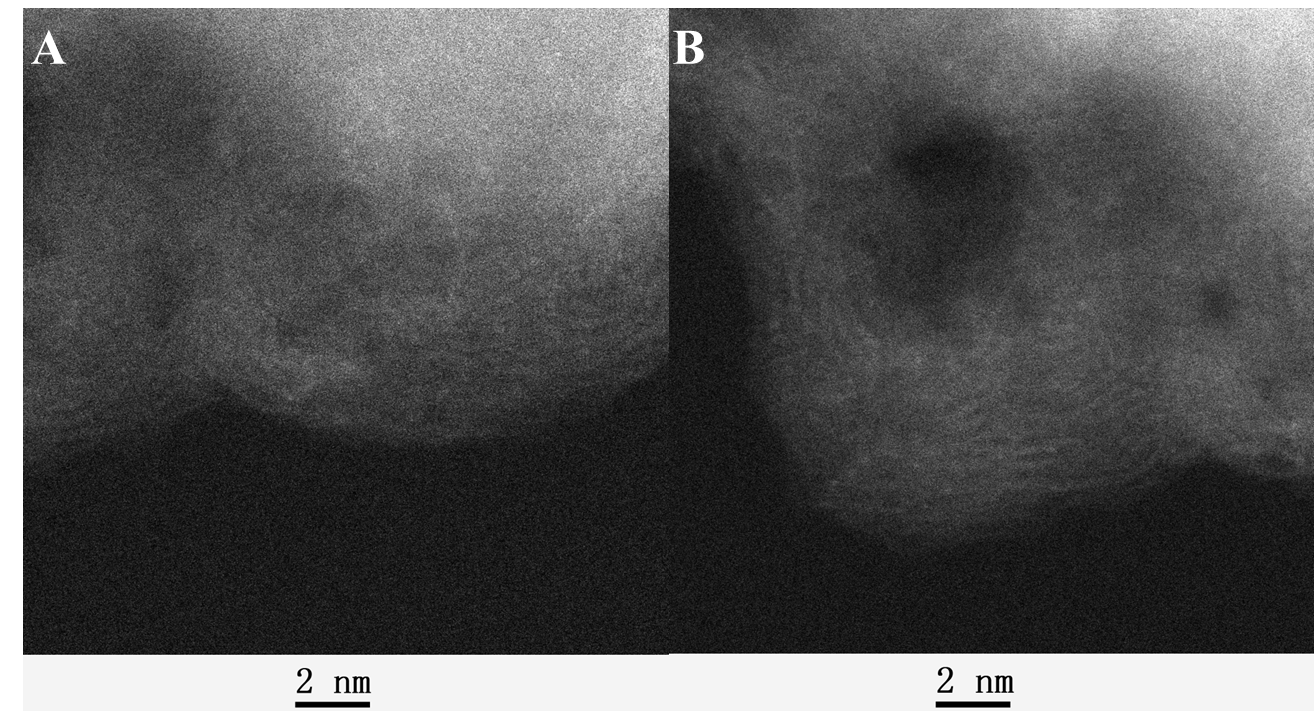


**Fig. S6** HAADF-STEM images of (a) N-C and (b) C samples.


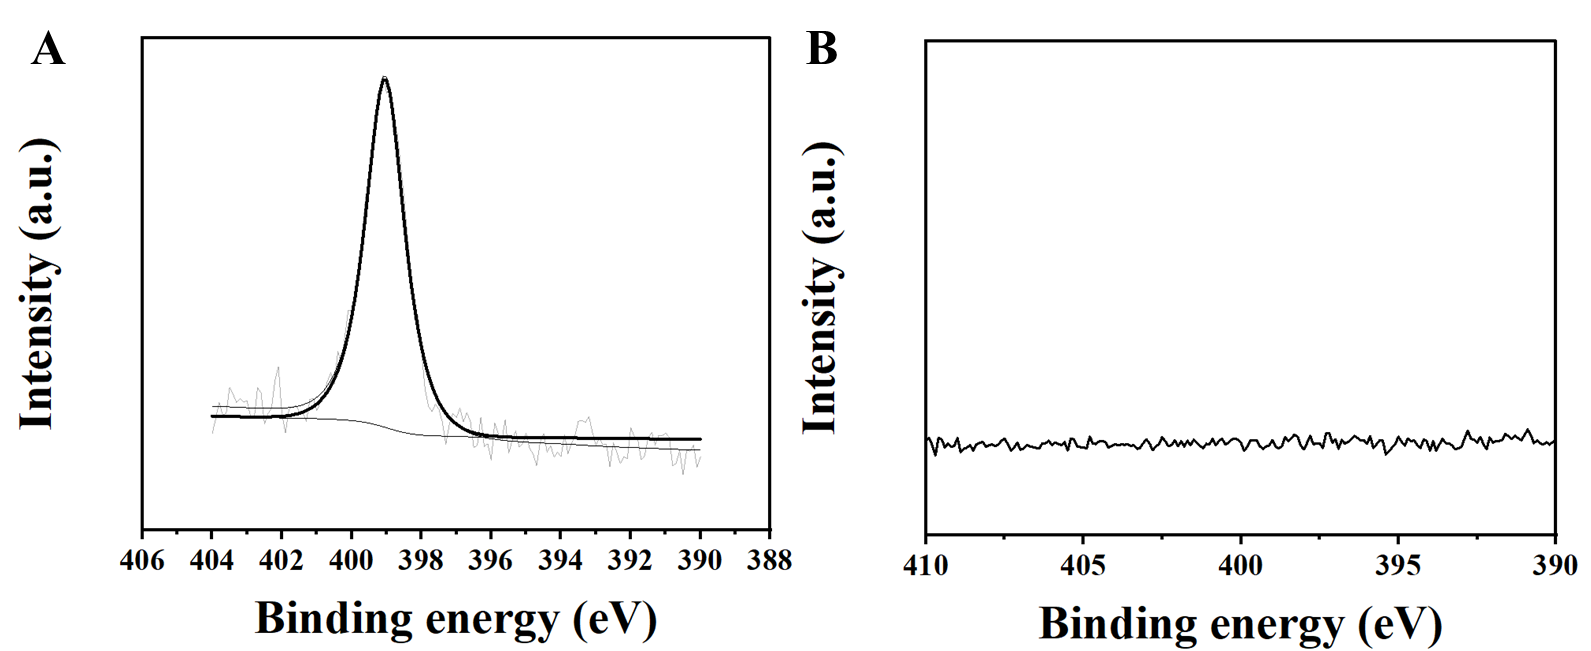


**Fig. S7** Deconvoluted N 1s spectra of (a) N-C and (b) C samples.


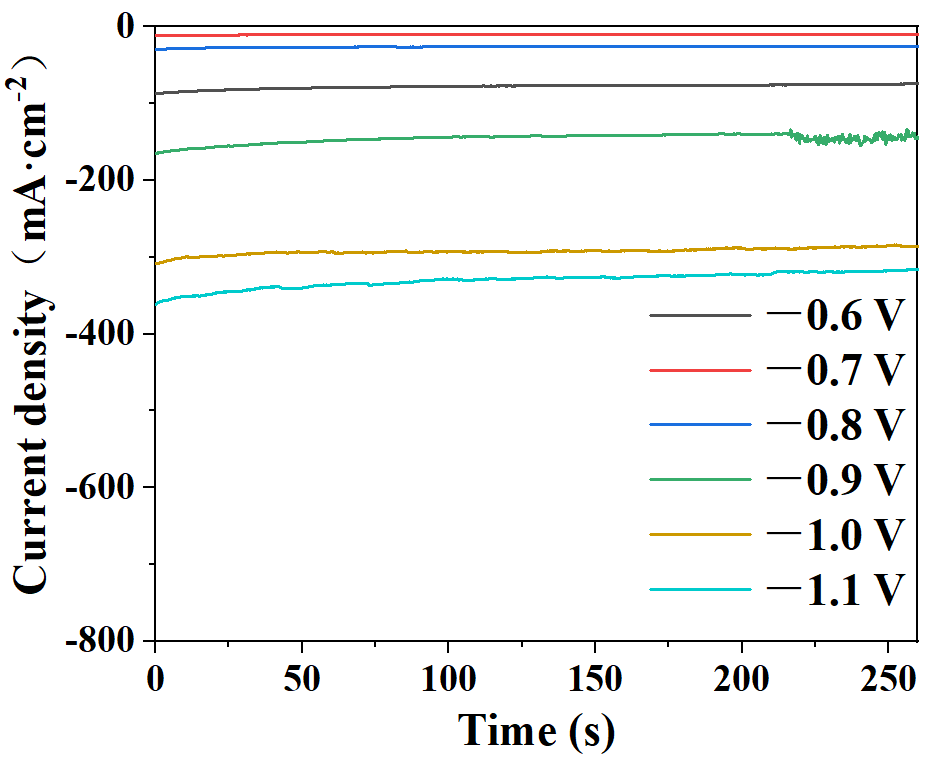


Fig. S8 Amperage curves of CO2 reduction catalyzed by CuN3-C in first 300 seconds at different potentials.


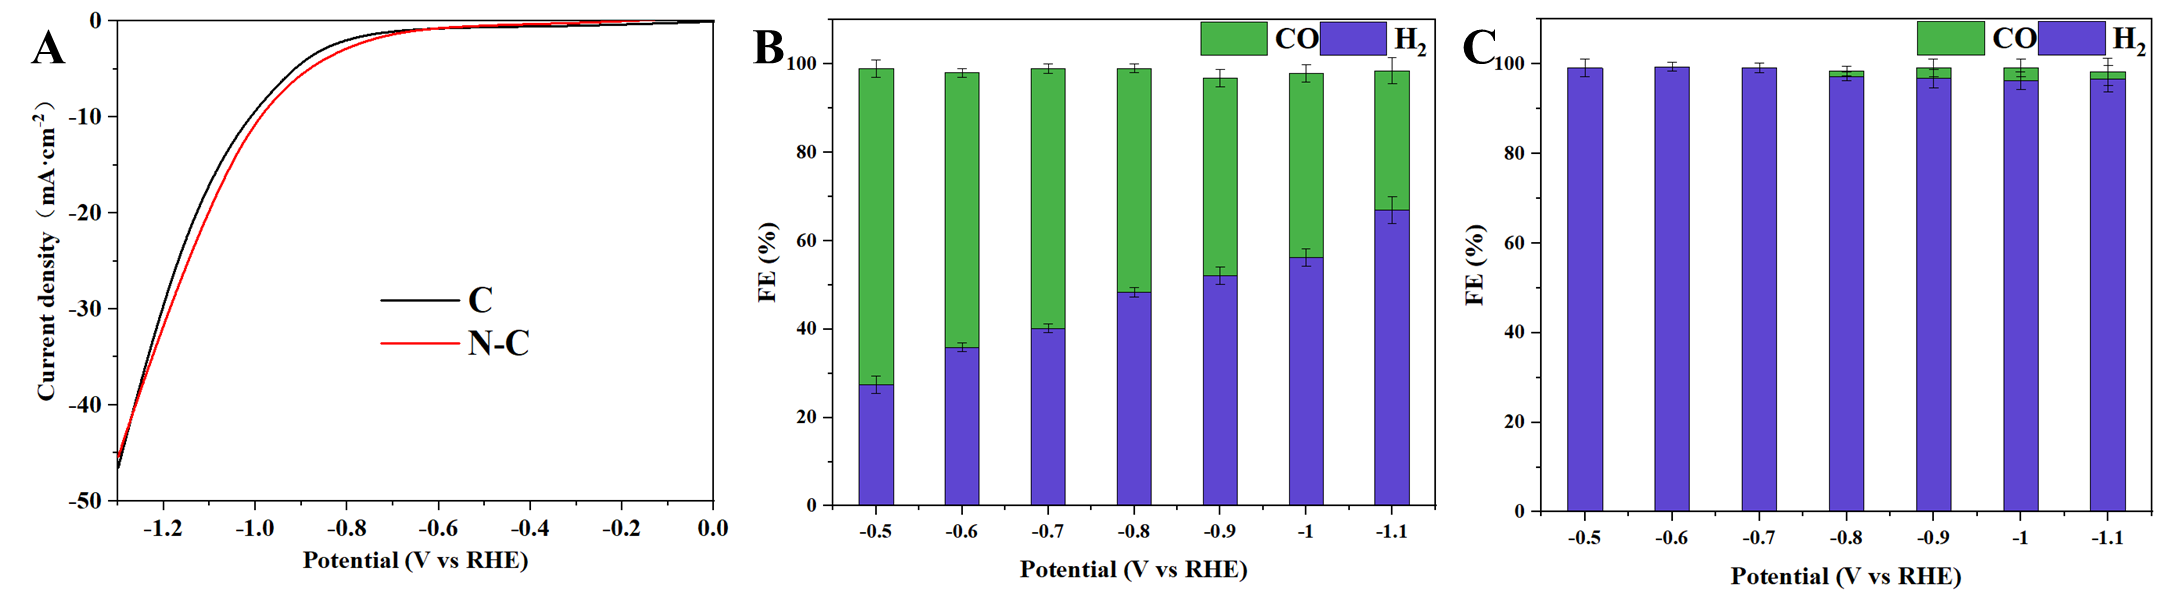


**Fig. S9** LSV andFaradaic efficiency distributions of CO2RR on (a) N-C and (b) C samples.


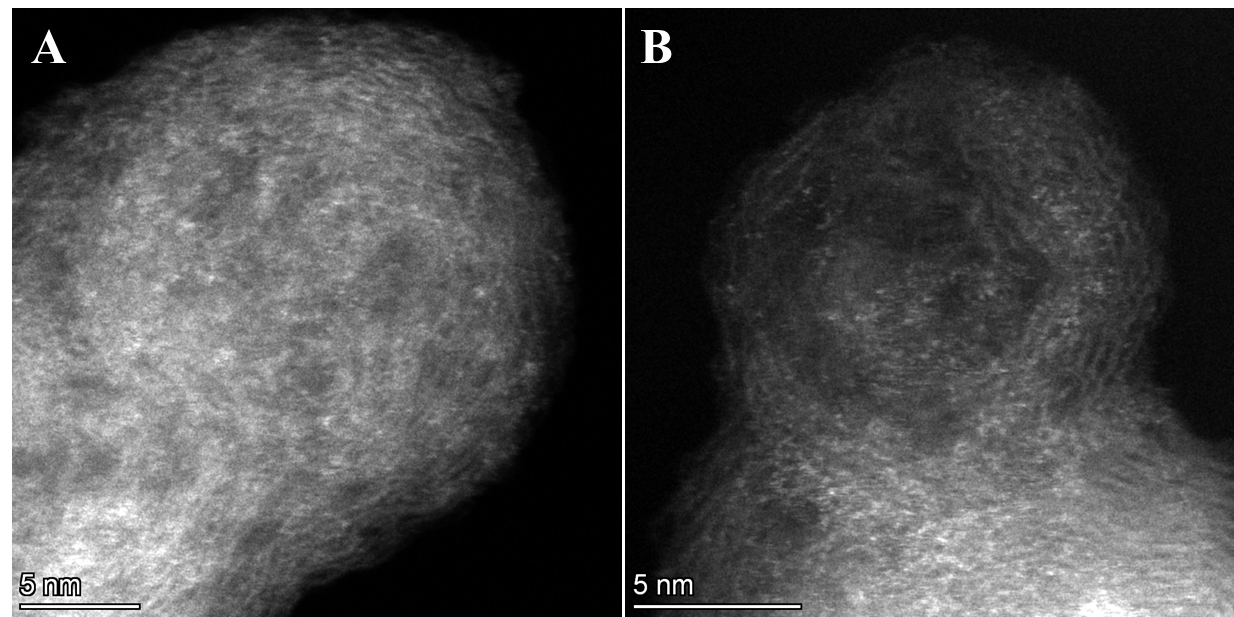


**Fig. S10** HAADF-STEM images of CuN3-C catalyst after test.


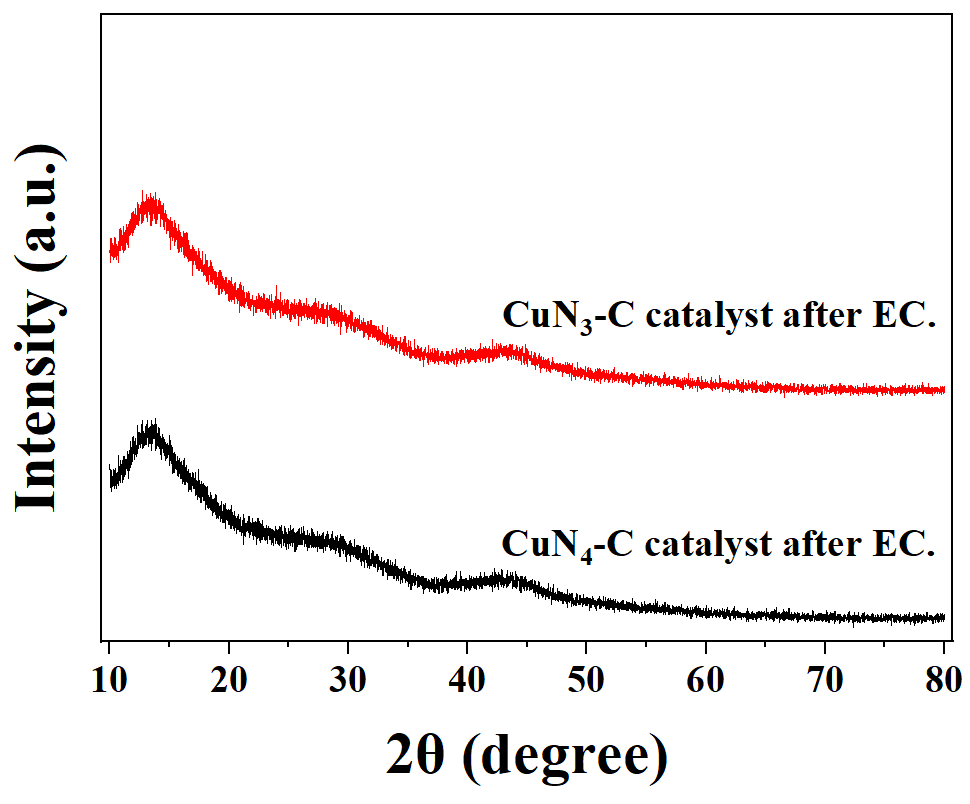


**Fig. S11** Structure and morphology of catalysts after the CO2RR electrolysis.


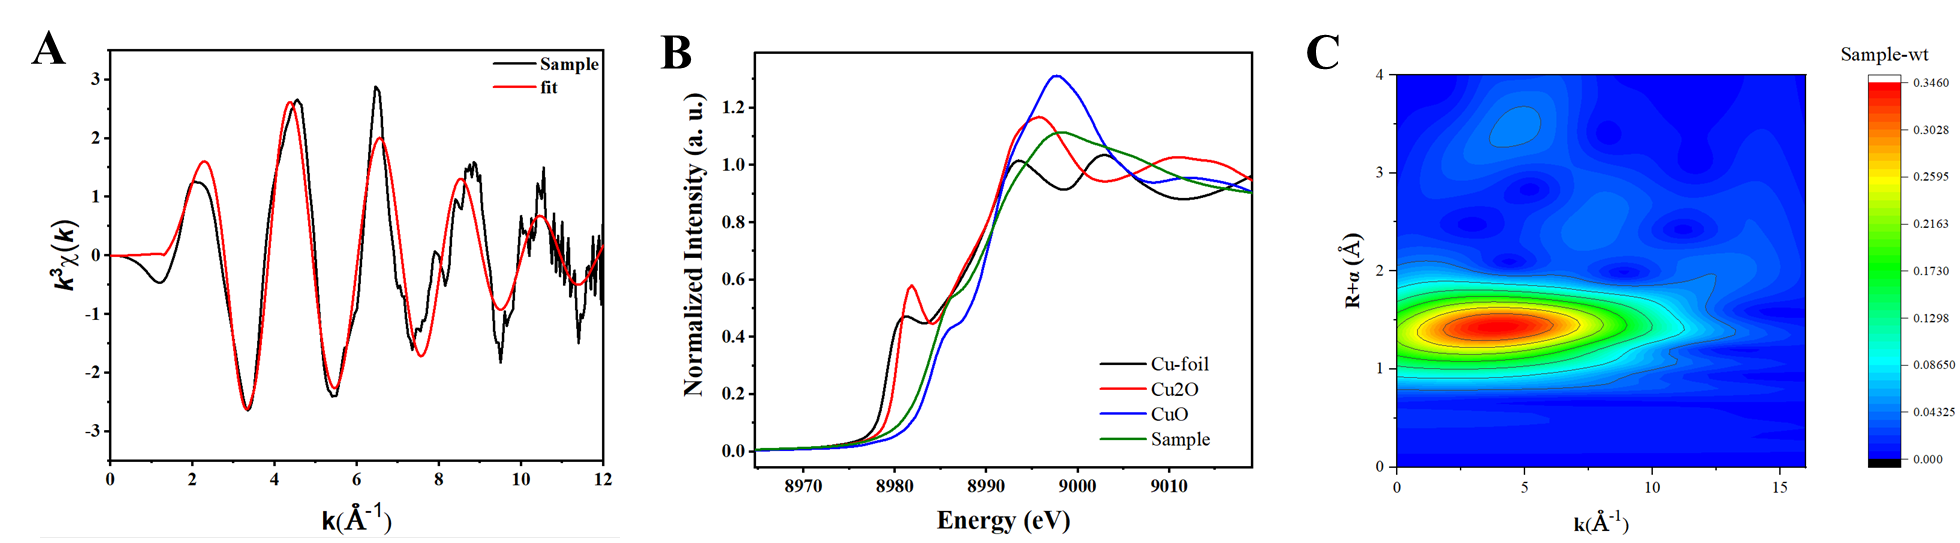


**Fig. S12** EXAFS spectra of CuN3-C catalyst after the CO2RR electrolysis


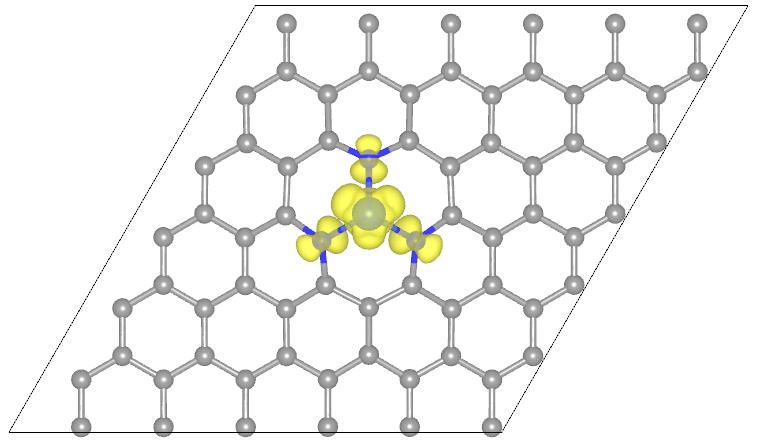


**Fig. S13** Model of CuN3-C catalyst.


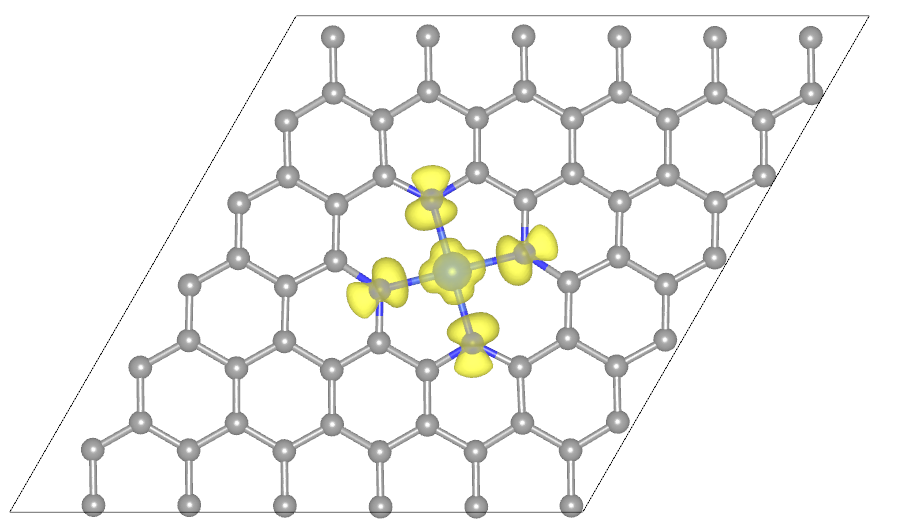


**Fig. S14** Model of CuN4-C catalyst.

**Table S1.** EXAFS fitting parameters at the Cu K-edge for various samples（*Ѕ*02=0.90 from Cu-foil）

| **Sample** | **Shell** | **CNa** | **R(Å)b** | **σ2(Å2)c** | **ΔE0(eV)d** | **S02** | **R factor** |
| --- | --- | --- | --- | --- | --- | --- | --- |
| **CuN3-C** | Cu-N | 3.1±0.1 | 1.95 | 0.005 | 4.8±0.7 | 0.7000(set) | 0.007 |
| **CuN4-C** | Cu-N | 4.0±0.1 | 1.95 | 0.008 | 4.2±0.3 | 0.7000(set) | 0.003 |

*aCN*: coordination numbers; *bR*: bond distance; *cσ*2: Debye-Waller factors; *d* Δ*E*0: the inner potential correction. R factor: goodness of fit. Error bounds that characterize the structural parameters obtained by EXAFS spectroscopy were estimated as CN±20%; R ± 1%; σ2 ± 20%.

**Table. S2** The Onset potential and current density of catalysts reacting with different gases.

| **Sample** | **Gaseous atmosphere** | **Onset potential**  **(V, Current density = −20 mA cm2)** | **Current density**  **(mA cm2, at**-**1.1 V)** |
| --- | --- | --- | --- |
| **CuN3-C** | Ar | −0.61 | −316 |
| **CuN3-C** | CO2 | −0.45 | −560 |
| **CuN4-C** | Ar | −0.71 | −301 |
| **CuN4-C** | CO2 | −0.65 | −471 |

**Table. S3** The Onset potential and Current density of catalysts reacting with different gases.

| **Potential**  **(V)** | **FE (%, over CuN3-C)** | | |
| --- | --- | --- | --- |
| CO | CH3OH | H2 |
| **−0.6** | 58.88 | 25.63 | 13.86 |
| **−0.7** | 47.16 | 40.12 | 11.17 |
| **−0.8** | 39.41 | 53.49 | 8.62 |
| **−0.9** | 29.10 | 61.45 | 5.79 |
| **−1.0** | 11.54 | 80.15 | 3.86 |
| **−1.1** | 20.37 | 65.22 | 9.18 |

**Table.S4** Faradaic efficiency distributions of CO2RR over CuN4-C

| **Potential**  **(V)** | **FE (%, over CuN4-C)** | | |
| --- | --- | --- | --- |
| CO | CH3OH | H2 |
| **−0.6** | 78.9 | 0 | 20.86 |
| **−0.7** | 74.16 | 2.58 | 23.17 |
| **−0.8** | 65.18 | 4.77 | 28.21 |
| **−0.9** | 53.5 | 8.12 | 32.96 |
| **−1.0** | 47.17 | 16.11 | 34.02 |
| **−1.1** | 39.66 | 30.99 | 27.11 |

**Table. S5** Faradaic efficiency distributions of CO2RR over CuN3-C

| **Potential**  **(V)** | **FE**  **(%)** | **Partial current density**  **(mA cm2)** |
| --- | --- | --- |
| **−0.6** | −25.63 | −11.53 |
| **−0.7** | −40.12 | −34.90 |
| **−0.8** | −53.49 | −86.65 |
| **−0.9** | −61.45 | −164.07 |
| **−1.0** | −80.15 | −332.33 |
| **−1.1** | −65.22 | −363.92 |

**Table S6** Comparison of the FE of CH3OH in aqueous conditions from this work and previous representative reports.

| Catalysts | FECH3OH  (%) | REF |
| --- | --- | --- |
| CuSAs/TCNFs | 44 | 1 |
| CoO/CN/Ni | 45 | 2 |
| CuN4-C | 45.1 | This work |
| Cu-3(HHTQ) | 53.6 | 3 |
| Ti3(Al1−xCux)C2 | 59.1 | 4 |
| Ag,S-Cu2O/Cu | 67.4 | 5 |
| Cu2NCN | 70 | 6 |
| CoO/CN/Ni | 70.7 | 2 |
| Co3O4/N-RGO | 74.8 | 7 |
| Cu2−xSe | 77 | 8 |
| CuN3-C | 78 | This work |

**Table S7** Comparison of the rate of CH3OH in aqueous conditions from this work and previous representative reports.

| Catalysts | CH3OH production rate | REF |
| --- | --- | --- |
| CuPc | 3.8 | 9 |
| CuSAs/TCNFs | 737.133 | 1 |
| CoO/CN/Ni | 178.7565 | 2 |
| CoPc/CNT | 200 | 10 |
| Cu-3(HHTQ) | 18.51468 | 3 |
| Ti3(Al1−xCux)C2 | 217.4145 | 4 |
| Ag,S-Cu2O/Cu | 1428.321 | 5 |
| Cu2NCN | 1115.889 | 6 |
| CoO/CN/Ni | 129.4335 | 2 |
| Pd/SnO2 | 2 | 11 |
| Co3O4/N-RGO | 51.6753 | 7 |
| CuN3-C | 5321.244 | This work |
| Cu2−xSe | 556.2004 | 8 |
| Pd83Cu17 | 439.3782 | 12 |
| Sn1 /Vo -CuO-x | 1025.25 | 13 |

计算方法

**Table S8** The Onset potential and Current density of C and N-C reacting with different gases.

| **Sample** | **Onset potential**  **(V, Current density = −10 mA cm2)** | **Current density**  **(mA cm2, at** **−1.1 V)** |
| --- | --- | --- |
| **C** | −1.01 | −16.82 |
| **N-C** | −0.98 | −19.76 |

**Table S9** Faradaic efficiency distributions of CO2RR over C and N-C

| **Potential**  **(V)** | **FE (%, over C)** | | | **FE (%, over N-C)** | | |
| --- | --- | --- | --- | --- | --- | --- |
| CO | CH3OH | H2 | CO | CH3OH | H2 |
| **-0.6** | 0 | 0 | 99.12 | 71.55 | 0 | 27.46 |
| **-0.7** | 0 | 0 | 99.43 | 62.16 | 0 | 35.88 |
| **-0.8** | 0 | 0 | 99.19 | 58.81 | 0 | 40.16 |
| **-0.9** | 1.24 | 0 | 97.22 | 50.68 | 0 | 48.34 |
| **-1.0** | 2.37 | 0 | 96.77 | 44.73 | 0 | 52.17 |
| **-1.1** | 2.88 | 0 | 96.28 | 41.75 | 0 | 56.21 |

**Table S10** Nyquist plot of catalysts over the frequency from 0.1 MHz to 0.1 Hz

| **Sample** | **Charge-transfer resistance**  **（Ω）** |
| --- | --- |
| **CuN3-C** | 6.2 |
| **CuN4-C** | 8.4 |

**Table 11.** EXAFS fitting parameters at the Cu K-edge for various samples（*Ѕ*02=0.90 from Cu-foil）

| **Sample** | **Shell** | **CNa** | **R(Å)b** | **σ2(Å2)c** | **ΔE0(eV)d** | **R factor** |
| --- | --- | --- | --- | --- | --- | --- |
| **CuN3-C** | Cu-N | 3.1±0.1 | 1.95 | 0.00084 | 6.2±0.7 | 0.0019 |

*aCN*: coordination numbers; *bR*: bond distance; *cσ*2: Debye-Waller factors; *d* Δ*E*0: the inner potential correction. R factor: goodness of fit. Error bounds that characterize the structural parameters obtained by EXAFS spectroscopy were estimated as CN±20%; R ± 1%; σ2 ± 20%.

**Table 12** Energy of the CH3OH pathway on CuN3-C catalyst

| **Intermediates** | **Energy (eV)** | **Energy (eV)** |
| --- | --- | --- |
| *+CO2 | 0 | 0 |
| *COOH | -0.65 | -0.45 |
| *CO | 0.9 | -1.29 |
| *CHO | -0.56 | -0.15 |
| *CHOH | 1.87 | -0.41 |
| *CH2OH | -1.3 | -0.82 |

**Table 13** D-band center of catalysts

| **Cu 3d** | **d-band center (eV)** |
| --- | --- |
| **CuN3-C** | **-1.58** |
| **CuN4-C** | **-3.12** |

1 Yang, H. *et al.* Scalable Production of Efficient Single-Atom Copper Decorated Carbon Membranes for CO2 Electroreduction to Methanol. *Journal of the American Chemical Society* **141**, 12717-12723, doi:10.1021/jacs.9b04907 (2019).

2 Wang, L. *et al.* Ternary heterostructural CoO/CN/Ni catalyst for promoted CO2 electroreduction to methanol. *Journal of Catalysis* **393**, 83-91, doi:10.1016/j.jcat.2020.11.012 (2021).

3 Liu, J. *et al.* Tricycloquinazoline‐Based 2D Conductive Metal–Organic Frameworks as Promising Electrocatalysts for CO2Reduction. *Angewandte Chemie International Edition* **60**, 14473-14479, doi:10.1002/anie.202103398 (2021).

4 Zhao, Q. *et al.* Selective Etching Quaternary MAX Phase toward Single Atom Copper Immobilized MXene (Ti3C2Clx) for Efficient CO2 Electroreduction to Methanol. *ACS Nano* **15**, 4927-4936, doi:10.1021/acsnano.0c09755 (2021).

5 Li, P. *et al.* In situ dual doping for constructing efficient CO2-to-methanol electrocatalysts. *Nature Communications* **13**, doi:10.1038/s41467-022-29698-3 (2022).

6 Kong, S. *et al.* Delocalization state-induced selective bond breaking for efficient methanol electrosynthesis from CO2. *Nature Catalysis* **6**, 6-15, doi:10.1038/s41929-022-00887-z (2022).

7 Bharath, G. *et al.* Self-Assembled Co3O4 Nanospheres on N-Doped Reduced Graphene Oxide (Co3O4/N-RGO) Bifunctional Electrocatalysts for Cathodic Reduction of CO2 and Anodic Oxidation of Organic Pollutants. *ACS Applied Energy Materials* **4**, 11408-11418, doi:10.1021/acsaem.1c02196 (2021).

8 Yang, D. *et al.* Selective electroreduction of carbon dioxide to methanol on copper selenide nanocatalysts. *Nature Communications* **10**, doi:10.1038/s41467-019-08653-9 (2019).

9 Kusama, S., Saito, T., Hashiba, H., Sakai, A. & Yotsuhashi, S. Crystalline Copper(II) Phthalocyanine Catalysts for Electrochemical Reduction of Carbon Dioxide in Aqueous Media. *ACS Catalysis* **7**, 8382-8385, doi:10.1021/acscatal.7b02220 (2017).

10 Guo, T. *et al.* Enhancing effect of cobalt phthalocyanine dispersion on electrocatalytic reduction of CO2 towards methanol. *Environmental Science and Pollution Research* **30**, 122755-122773, doi:10.1007/s11356-023-30883-0 (2023).

11 Zhang, W. *et al.* Electrochemical Reduction of Carbon Dioxide to Methanol on Hierarchical Pd/SnO2 Nanosheets with Abundant Pd–O–Sn Interfaces. *Angewandte Chemie International Edition* **57**, 9475-9479, doi:10.1002/anie.201804142 (2018).

12 Lu, L. *et al.* Highly Efficient Electroreduction of CO2 to Methanol on Palladium–Copper Bimetallic Aerogels. *Angewandte Chemie International Edition* **57**, 14149-14153, doi:10.1002/anie.201808964 (2018).

13 Guo, W. *et al.* Highly Efficient CO2 Electroreduction to Methanol through Atomically Dispersed Sn Coupled with Defective CuO Catalysts. *Angewandte Chemie International Edition* **60**, 21979-21987, doi:10.1002/anie.202108635 (2021).
